# Supplementary material
Source: publisher figshare collection journal article supplement (https://acs.figshare.com/ndownloader/files/21743901)
Supplement: Supplementary file 1 [file 21743901]

# Supporting Information

## Genetically Expanded Reactive-Oxygen-Tolerant Alcohol Dehydrogenase II

Ashok Kumar Bhagat<sup>1</sup>, Hadar Buim<sup>1</sup>, Guy Shmul<sup>2</sup>, Lital Alfonta<sup>\*1</sup>

<sup>1</sup>*Departments of Life Sciences, Chemistry and Ilse Katz Institute for Nanoscale Science and Technology, Ben-Gurion University of the Negev, Beer-Sheva 84105, Israel.* <sup>2</sup>*Department of Chemical Research Support, The Weizmann Institute of Science, Rehovot 7610001, Israel*

\*Corresponding author: Lital Alfonta; alfontal@bgu.ac.il

### Table of contents:

|                   |                                                                                                        |           |
|-------------------|--------------------------------------------------------------------------------------------------------|-----------|
| <b>Figure. S1</b> | <b>Mutants created by site-directed mutagenesis</b>                                                    | <b>S1</b> |
| <b>Figure. S2</b> | <b>ITC results for FeCl<sub>3</sub> titration to the WT and mutant ADHII</b>                           | <b>S2</b> |
| <b>Figure. S3</b> | <b>Catalytic activity of WTADHII in the presence of zinc (<i>in vitro</i>)</b>                         | <b>S3</b> |
| <b>Figure. S4</b> | <b>Ethanol production by ADHIIDOPA and ADHII in vivo in <i>E. coli</i></b>                             | <b>S4</b> |
| <b>Figure. S5</b> | <b>Lineweaver-Burk plots of catalytic activity of ADHIIDOPA</b>                                        | <b>S5</b> |
| <b>Figure. S6</b> | <b>CVs of rGO/MB/ADHII/GCE</b>                                                                         | <b>S6</b> |
| <b>Figure. S7</b> | <b>CVs of electrocatalytic reduction of acetaldehyde in the presence of H<sub>2</sub>O<sub>2</sub></b> | <b>S7</b> |
| <b>Figure. S8</b> | <b>Catalytic activity of H277F and H277Y ADHII</b>                                                     | <b>S7</b> |

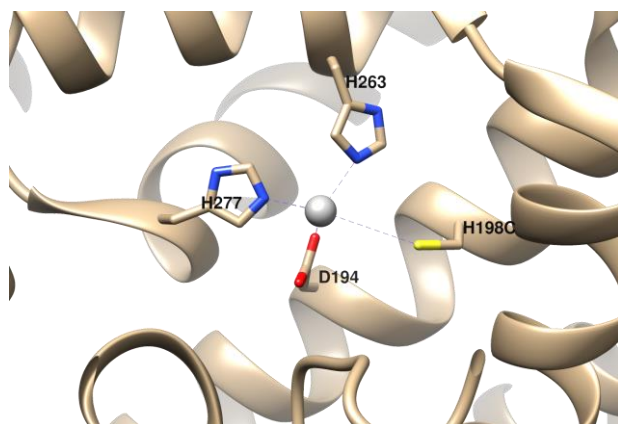

**H198C**

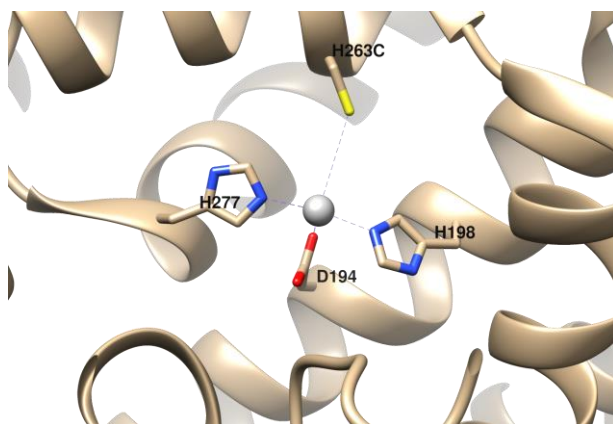

**H263C**

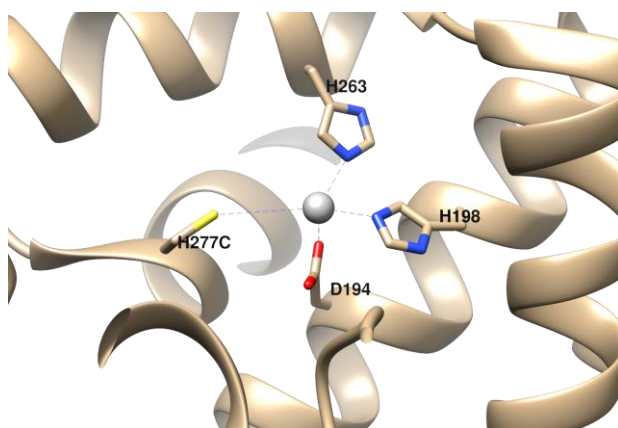

**H277C**

**Figure S1. Models of active-site mutants of ADHII** (constructed using UCSF Chimera); Mutated amino acids in the active site of ADHII and predicted binding mode of the active-site, displaying Zn (II), center sphere, silver. Mutants are: H198C, H263C and H277C. Cysteine (C) is shown in yellow.

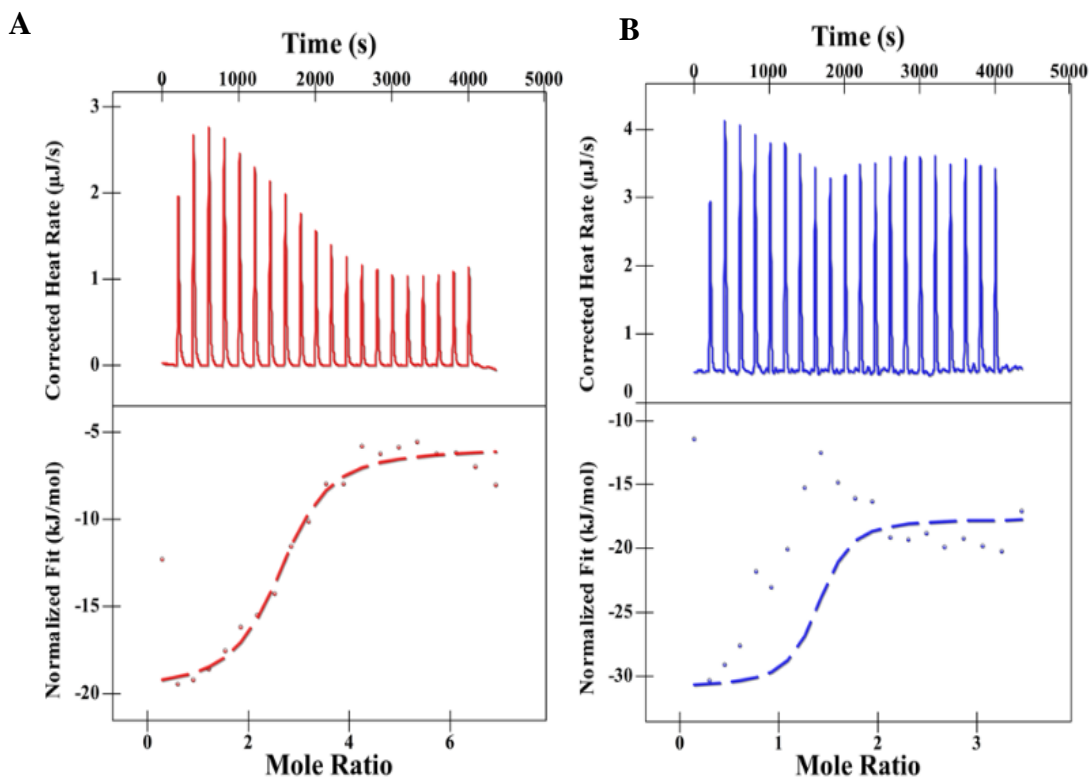

**Figure S2.** ITC results of  $\text{FeCl}_3$  titration to the WT and mutant ADHII. (A) WT ADHII (red) (B) DOPAADHII (blue). It could be seen from the DOPAADHII blue curve that there is no fit, indicating no binding of iron ions upon its titration to the enzyme solution.

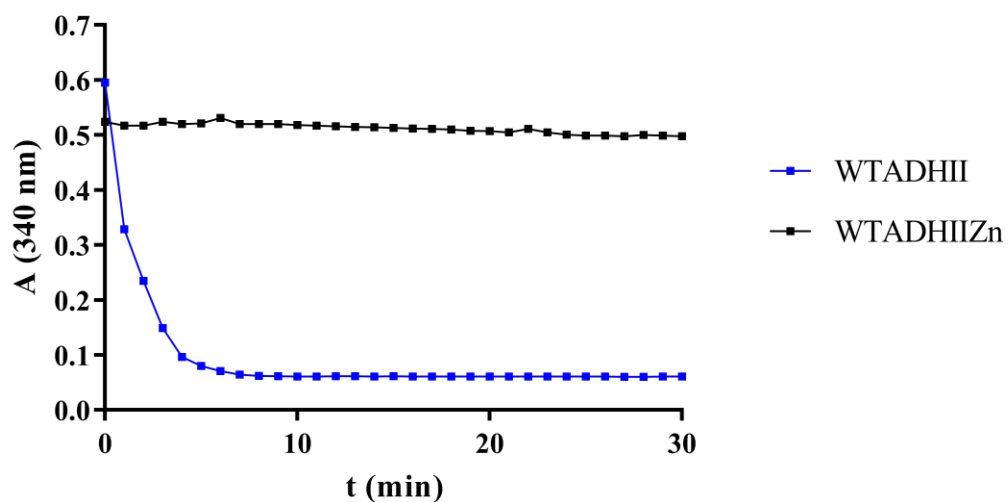

**Figure S3.** Catalytic activity of WTADHII in the presence of  $\text{Zn}^{2+}$  (*in vitro*).

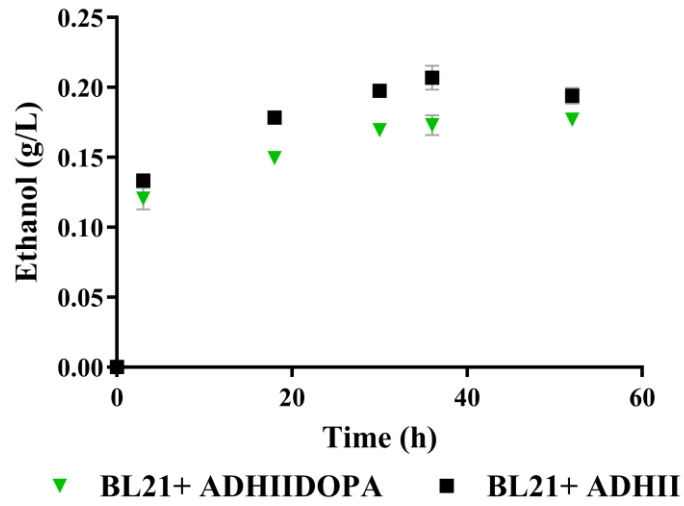

**Figure S4.** Ethanol production by ADHIIDOPA in the presence of  $\text{Zn}^{2+}$  in vivo in *E. coli*.  $\text{Zn}^{2+}$  was not added to the cells expressing WT ADHII (as it was shown to be inactivating). Hence, it could be seen that in vivo, mutant and WT cumulative ethanol production activities are comparable when exogenous zinc is added to the growth media.

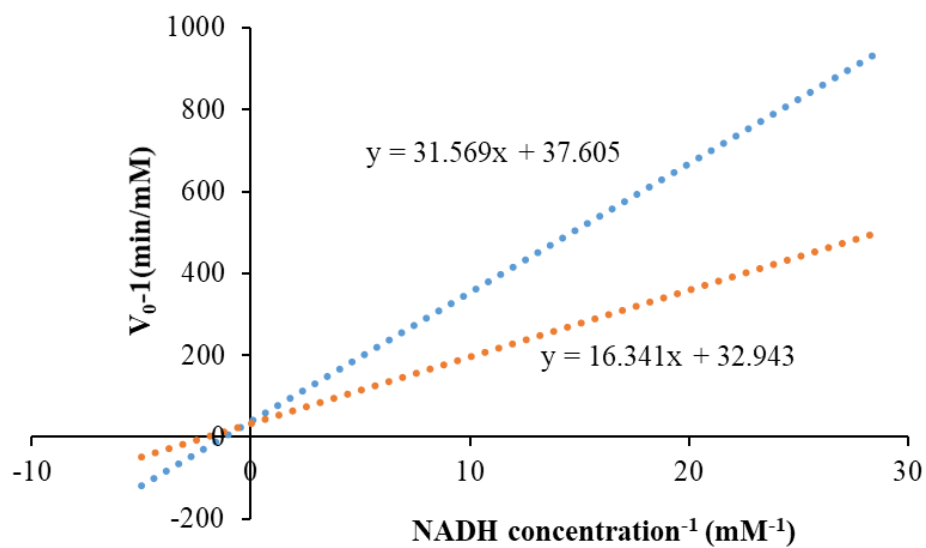

**Figure S5.** Lineweaver-Burk plots of ADHII catalytic activity of mutant ADHIIDOPA in the presence (orange curve) and absence (blue curve) of hydrogen peroxide. The turnover rates of the mutant were extracted from these plots and are shown in table 3 of the manuscript.

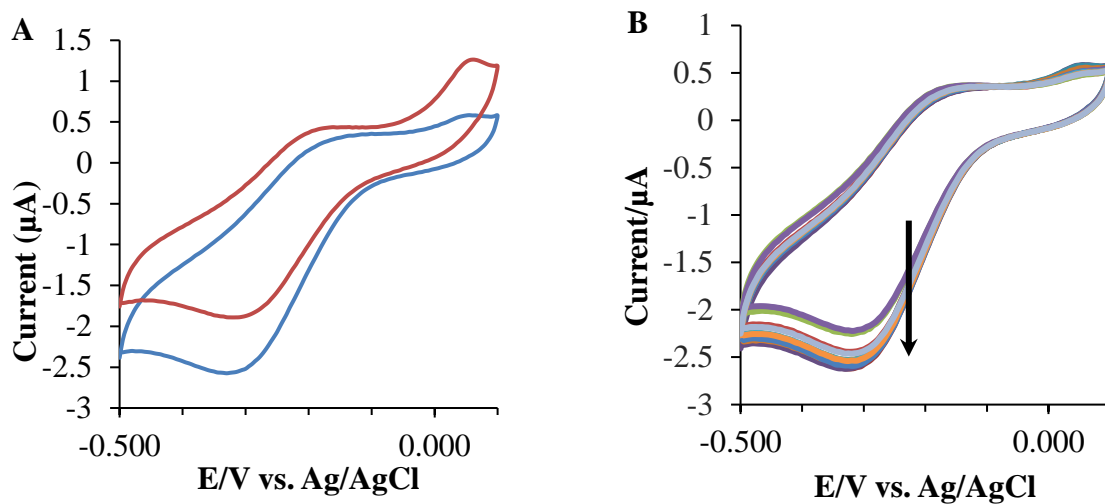

**Figure S6.** (A) Representative cyclic voltammograms (CVs) of reduced graphene oxide/ methylene blue/ WTADHII/ Galssy Carbon Electrode : rGO/MB/WTADHII/GCE for acetaldehyde reduction in the presence (blue) and absence (red) of acetaldehyde (13 mM). Scan rate is 5 mV/s. Potential step: 0.005V (vs.Ag/AgCl), 100 μM MB was used as a redox mediator and 2 mM NADH was used as a cofactor; reference electrode: Ag/AgCl.; (B) CVs for successive additions of acetaldehyde from 1-10 mM, acetaldehyde reduction potential is measured at (-) 0.320 V vs Ag/AgCl.

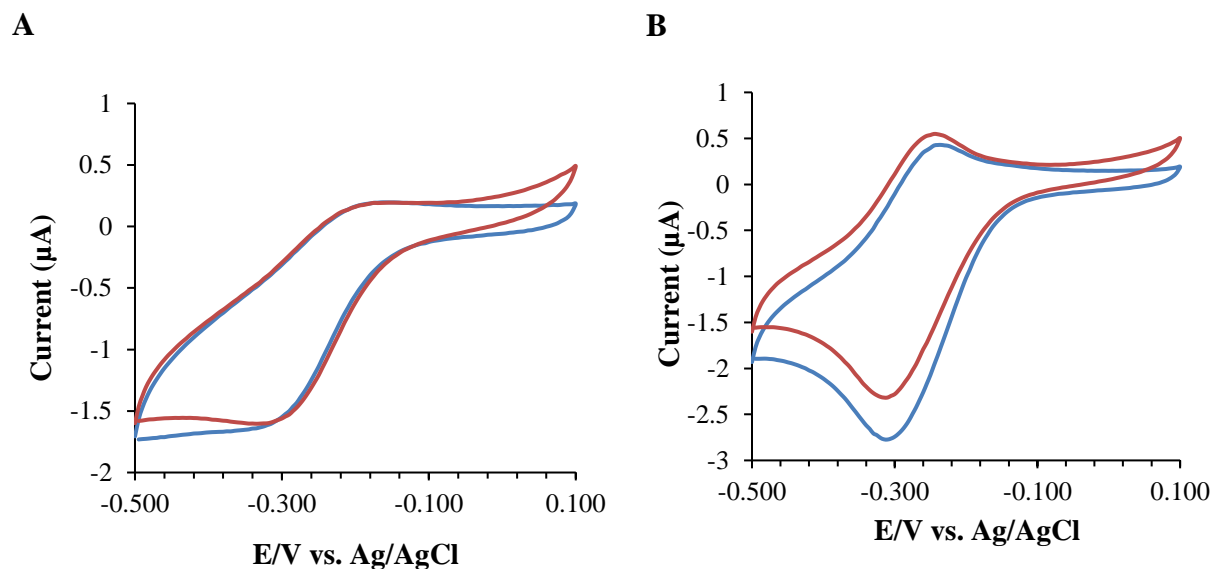

**Figure S7.** CVs of  $\text{H}_2\text{O}_2$  treated WT and mutant ADHII modified electrode with (blue) and without (red) 10 mM acetaldehyde. (A) rGO/MB/WTADHII/GCE; (B) rGO/MB/ADHIIIDOPA/GCE. CVs were performed at a scan rate of 5 mV/s in PB (pH 7.0).

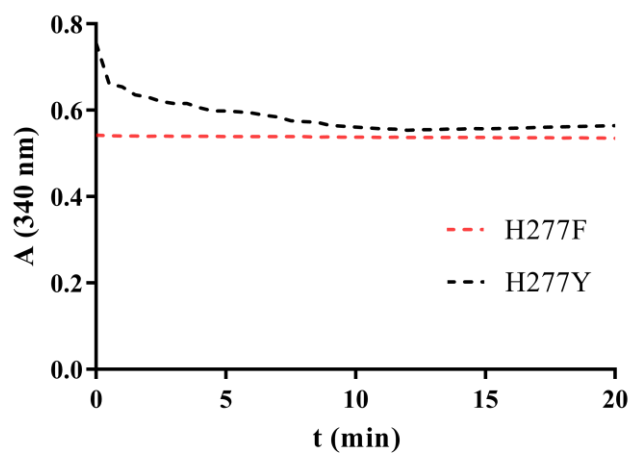

**Figure S8.** Catalytic activity of mutants H277F, and H277Y ADHII (0.25  $\mu\text{M}$ )
